# Supplementary material for: Pharmacogenomics of Cardiovascular Drugs for Atherothrombotic, Thromboembolic and Atherosclerotic Risk
Source: MDPI journal article supplement (doi:10.3390/genes14112057), 2023-11-09
Supplement: s1 [file s1]

**Table S1.** Dosing recommendations for Clopidogrel (CPIC guidelines)[1]

| Drug        | Enzyme  | Phenotype | Clinical implications                                                                                                                                                        | Recommendation for therapy modification                                                            | CPIC guidance |
|-------------|---------|-----------|------------------------------------------------------------------------------------------------------------------------------------------------------------------------------|----------------------------------------------------------------------------------------------------|---------------|
| Clopidogrel | CYP2C19 | UM        | Increased clopidogrel active metabolite formation<br>lower on- treatment platelet reactivity<br>no association with higher bleeding risk                                     | Use standard dose (75 mg/day)                                                                      | Strong        |
|             |         | RP        | Normal or increased clopidogrel active metabolite formation<br>normal or lower on-treatment platelet reactivity<br>no association with higher bleeding risk                  | Use standard dose (75 mg/day)                                                                      | Strong        |
|             |         | NM        | Normal clopidogrel active metabolite formation<br>normal on-treatment platelet reactivity                                                                                    | Use standard dose (75 mg/day)                                                                      | Strong        |
|             |         | IM        | Reduced clopidogrel active metabolite formation<br>increased on-treatment platelet reactivity<br>increased risk for adverse cardiac and cerebrovascular events               | Avoid Clopidogrel if possible; use Prasugrel or Ticagrelor at standard dose if no contraindication | Strong        |
|             |         | PM        | Significantly reduced clopidogrel active metabolite formation<br>increased on-treatment platelet reactivity<br>increased risk for adverse cardiac and cerebrovascular events | Avoid Clopidogrel if possible; use Prasugrel or Ticagrelor at standard dose if no contraindication | Strong        |

UM: Ultrarapid Metabolizer; RP: Rapid Metabolizer; NM: Normal Metabolizer; IM: Intermediate Metabolizer; PM: Poor Metabolizer.

**Table S2.** Dosing recommendations for Statins (CPIC guidelines) [1]

| Drug         | Enzyme  | Phenotype | Clinical implications                                                                                                                | Recommendation for therapy modification                                                                                                                                                                                                                                                                                                                                                                                                                                                    | CPIC guidance |
|--------------|---------|-----------|--------------------------------------------------------------------------------------------------------------------------------------|--------------------------------------------------------------------------------------------------------------------------------------------------------------------------------------------------------------------------------------------------------------------------------------------------------------------------------------------------------------------------------------------------------------------------------------------------------------------------------------------|---------------|
| Atorvastatin | SLC01B1 | PF        | Increased atorvastatin exposure as compared with normal and decreased function, which may translate to increased myopathy risk       | Prescribe $\leq 20$ mg as a starting dose and adjust doses of atorvastatin based on disease-specific guidelines. If dose $> 20$ mg is needed for desired efficacy, consider rosuvastatin or combination therapy                                                                                                                                                                                                                                                                            | Moderate      |
| Fluvastatin  | SLC01B1 | PF        | Increased fluvastatin exposure as compared with normal and decreased function; typical myopathy risk with doses $\leq 40$ mg         | Prescribe $\leq 40$ mg per day as a starting dose and adjust doses of fluvastatin based on disease-specific guidelines. If patient is tolerating 40 mg per day but higher potency is needed, a higher dose ( $> 40$ mg) or an alternative statin (see <b>Figure 1</b> for recommendations for alternative statins) or combination therapy could be considered. Prescriber should be aware of possible increased risk for myopathy with fluvastatin especially with doses $> 40$ mg per day | Moderate      |
|              | CYP2C9  | PF        | Increased fluvastatin exposure as compared with normal and intermediate metabolizer, which may translate to increased myopathy risk. | Prescribe $\leq 20$ mg per day as a starting dose and adjust doses of fluvastatin based on disease-specific guidelines. If dose $> 20$ mg needed for desired efficacy, consider an alternative statin or combination therapy                                                                                                                                                                                                                                                               | Moderate      |
| Lovastatin   | SLC01B1 | PF        | Increased lovastatin acid exposure as compared with normal and decreased function, which may translate to increased myopathy risk    | Prescribe an alternative statin depending on the desired potency                                                                                                                                                                                                                                                                                                                                                                                                                           | Moderate      |
| Pravastatin  | SLC01B1 | PF        | Increased pravastatin statin exposure as compared with normal and decreased function; typical myopathy risk with doses $\leq 40$ mg  | Prescribe $\leq 40$ mg as a starting dose and adjust doses of pravastatin based on disease-specific guidelines. If patient is tolerating 40-mg dose but higher potency is needed, a higher dose ( $> 40$ mg) or an alternative statin (see <b>Figure 1</b> for recommendations for alternative statins) or combination therapy could be considered. Prescriber should be aware of possible increased risk for myopathy especially with pravastatin doses $> 40$ mg                         | Moderate      |

|              |         |    |                                                                                                                                      |                                                                                                                                                                                                                                      |          |
|--------------|---------|----|--------------------------------------------------------------------------------------------------------------------------------------|--------------------------------------------------------------------------------------------------------------------------------------------------------------------------------------------------------------------------------------|----------|
| Rosuvastatin | SLC01B1 | PF | Increased rosuvastatin exposure as compared with normal function and decreased function; typical myopathy risk with doses ≤20 mg     | Prescribe ≤20 mg as a starting dose and adjust doses of rosuvastatin based on disease-specific and population-specific guidelines If dose >20 mg needed for desired efficacy, consider combination therapy                           | Moderate |
|              | ABCG2   | PF | Increased rosuvastatin exposure compared with normal and decreased function; unknown myopathy risk; increased lipid-lowering effects | Prescribe ≤20 mg as a starting dose and adjust doses of rosuvastatin based on disease-specific and population-specific guidelines. If dose >20 mg needed for desired efficacy, consider an alternative statin or combination therapy | Moderate |
| Simvastatin  | SLC01B1 | PF | Increased simvastatin acid exposure compared with normal and decreased function; highly increased myopathy risk                      | Prescribe an alternative statin depending on the desired potency                                                                                                                                                                     | Strong   |

*PF: Poor Function*

**Table S3.** Patient characteristics utilized in IWPC algorithm [1]

|                       |
|-----------------------|
| Age                   |
| Height                |
| Weight                |
| VKORC1 genotype       |
| CYP2C9 genotype       |
| Race                  |
| Taking Enzyme Inducer |
| Taking Amiodarone     |
